# Supplementary material
Source: Elsevier journal article supplement (https://www.sciencedirect.com/science/article/pii/S0870255120302055)
Supplement: mmc1 [file S0870255120302055:mmc1.doc]

Supplemental table – Monthly national costs (euros).

| Age (years) | Male | Female |
| --- | --- | --- |
| 18 | 876,41 | 646,16 |
| 19 | 931,53 | 718,55 |
| 20 | 963,81 | 766,65 |
| 21 | 985,21 | 800,32 |
| 22 | 1001,15 | 854,98 |
| 23 | 1060,27 | 924,00 |
| 24 | 1122,42 | 979,59 |
| 25 | 1169,80 | 1033,87 |
| 26 | 1240,16 | 1062,66 |
| 27 | 1288,97 | 1093,28 |
| 28 | 1343,58 | 1125,61 |
| 29 | 1324,10 | 1167,27 |
| 30 | 1368,46 | 1177,98 |
| 31 | 1444,41 | 1216,07 |
| 32 | 1457,44 | 1242,86 |
| 33 | 1492,44 | 1278,32 |
| 34 | 1540,07 | 1303,71 |
| 35 | 1590,50 | 1316,88 |
| 36 | 1618,09 | 1333,61 |
| 37 | 1668,51 | 1359,88 |
| 38 | 1725,20 | 1385,68 |
| 39 | 1779,07 | 1404,90 |
| 40 | 1801,02 | 1405,64 |
| 41 | 1849,23 | 1410,65 |
| 42 | 1879,10 | 1422,87 |
| 43 | 1910,65 | 1408,26 |
| 44 | 1912,92 | 1394,54 |
| 45 | 1909,28 | 1385,38 |
| 46 | 1931,19 | 160,89 |
| 47 | 1870,02 | 1325,91 |
| 48 | 1875,01 | 1309,58 |
| 49 | 1885,34 | 1284,97 |
| 50 | 1880,89 | 1286,80 |
| 51 | 1908,95 | 1276,16 |
| 52 | 1917,82 | 1248,66 |
| 53 | 1887,85 | 1236,38 |
| 54 | 1898,52 | 1227,89 |
| 55 | 1886,37 | 1226,22 |
| 56 | 1914,91 | 1240,52 |
| 57 | 1883,69 | 1252,19 |
| 58 | 1964,65 | 1228,11 |
| 59 | 1949,77 | 1256,61 |
| 60 | 1995,55 | 1201,36 |
| 61 | 2092,20 | 1245,87 |
| 62 | 2100,06 | 1181,63 |
| 63 | 1961,03 | 1164,26 |
| 64 | 2007,31 | 1134,85 |
| 65 | 2077,43 | 1125,91 |
| 66 | 2099,91 | 1202,31 |
| 67 | 1903,28 | 1251,55 |
| 68 | 1879,35 | 1111,13 |
| 69 | 2083,28 | 1164,65 |
| 70 | 1826,05 | 1044,55 |
